# Supplementary material for: miR-4270 suppresses hepatocellular carcinoma progression by inhibiting DNMT3A-mediated methylation of HGFAC promoter
Source: PeerJ. 2023 Dec 5;11:e16566. doi: 10.7717/peerj.16566 (PMC10704985; doi:10.7717/peerj.16566)
Supplement: Supplemental Information 2 [file peerj-11-16566-s002.xlsx]

## Sheet: Figure 1
1C	Normal (114)	Tumor (114)		1D	Stage I	Stage II	Stage III	Stage IV		1E	L02	SMMC-7721	Hep3B	HepG2	MHCC97H	Huh7
	15.82	12.35			12.83	11.44	11.2	13.3			1	0.38	0.47	0.2	0.65	0.22
	14.63	11.62			14.62	10.56	13.25	12.97			1.01	0.38	0.48	0.24	0.56	0.16
	15.31	10.36			16.17	15.37	11.28	13.5			1.05	0.4	0.51	0.24	0.61	0.25
	14.08	10.25			15.25	10.96	16.08	13.07			1.02	0.4	0.44	0.29	0.66	0.17
	14.95	11.68			12.88	9.47	10.25	11.88			0.99	0.41	0.51	0.22	0.64	0.22
	14.66	15.64			10.63	9.81	8.85	15.73			0.92	0.35	0.49	0.22	0.62	0.22
	16.23	16.58			12.82	8.51	9.46	15.2
	16.52	16.24			13.79	7.72	10.73	9.59
	15.44	15.34			13.58	10.86	8.2	14.14
	15.36	11.26			8.24	11.76	7.28	14.03
	15.35	7.68			9.77	10.31	5.5	12.38
	14.86	8.77			9.61	9.01	5.13	13.05
	14.67	9.13			10.53	6.43	7.36	11.27
	13.67	6.87			10.71	8.21	6.89	11.46
	13.58	10.64			16.58	7.79	10.97	10.9
	14.96	11.68
	16.88	11.28
	16.25	12.37
	16.43	11.35
	15.2	10.68
	14.03	14.68
	13.24	13.88
	16.61	13.67
	15.3	14.12
	14.16	4.88
	15.77	9.35
	16.92	9.17
	14.52	8.46
	17.03	8.89
	15.22	10.67
	11.85	10.68
	12.76	12.68
	15	13.64
	9.27	11.26
	11.99	10.01
	17.78	9.5
	15.8	9.43
	9.49	9.2
	15	8.55
	18.66	8.43
	15.82	8.24
	15.74	8.1
	13.01	7.68
	18.16	7.98
	14.35	10.36
	15.26	11.58
	16.4	10.71
	16.25	9.34
	15	13.28
	15.35	11.57
	19.99	13.68
	9.48	11.22
	13.6	10.79
	13.07	11.34
	15.6	9.77
	16.86	9.43
	20.22	9.25
	14.73	8.36
	17.43	6.55
	11.43	6.27
	17.18	5.28
	14.44	11.33
	12.05	10.85
	14.16	13.67
	20.32	12.71
	17.07	10.64
	13.72	12.5
	16.02	11.6
	15.12	11.49
	14.24	10.63
	11.95	11.82
	15.91	11.16
	10.14	10.34
	19.05	9.45
	14.84	10.88
	13.17	14.58
	12.28	14.24
	11.62	15.1
	11.51	10.64
	15.8	10.82
	16.18	9.77
	16.15	9.61
	12.36	5.83
	14.98	8.72
	12.98	8.85
	15.13	10.76
	21.5	11.99
	11.57	10.79
	19.45	13.82
	15	11
	18.26	10.79
	17.02	9.55
	14.58	8.21
	19.42	8.46
	18.3	8.57
	15.38	9.68
	16.5	9.8
	15.02	10.67
	15	10.82
	11.75	9.44
	10.57	12.35
	11.59	12.88
	15.08	12.94
	17.98	12.87
	16.94	13.68
	14.72	13.82
	16.81	8.55
	12.27	8.24
	14.22	8.62
	16.74	7.49
	13.05	7.28
	17.82	7.55
	19.3	8.13
	18.12	7.08

## Sheet: Figure 2
2A
	NC mimic							miR-4270 mimic
HepG2	1	0.92	0.8	1.14	1.13	0.98		4.33	4.14	4.07	3.47	3.7	4.26
Huh7	1	1.09	0.82	1.03	0.75	1.26		4.78	4.29	3.6	4.23	4.23	4.23
2B
	NC mimic							miR-4270 mimic
0 h	0.22	0.22	0.19	0.26	0.27	0.25		0.29	0.18	0.25	0.23	0.27	0.3
24 h	0.41	0.55	0.49	0.51	0.46	0.49		0.3	0.3	0.33	0.35	0.38	0.46
48 h	0.78	0.76	0.82	0.86	0.79	0.83		0.55	0.62	0.64	0.61	0.67	0.56
72 h	1.73	1.84	1.78	1.64	1.77	1.84		1.21	1.19	1.01	1.05	1.18	1.05
	NC mimic							miR-4270 mimic
0 h	0.25	0.3	0.22	0.25	0.24	0.22		0.18	0.28	0.25	0.27	0.23	0.27
24 h	0.54	0.53	0.51	0.5	0.53	0.57		0.34	0.33	0.32	0.28	0.25	0.34
48 h	0.71	0.77	0.71	0.75	0.8	0.86		0.59	0.57	0.43	0.48	0.54	0.6
72 h	1.61	1.68	1.76	1.63	1.65	1.73		1.14	1.01	0.89	1.11	1.01	1.11
2C
	NC mimic							miR-4270 mimic
HepG2	157	148	158	157	157	137		63	65	70	54	63	60
Huh7	177	183	182	164	159	175		59	76	65	63	74	67
2D
	NC mimic							miR-4270 mimic
HepG2	5.39	6.06	5.8	5.65	5.72	5.3		16.09	15.32	15.58	15.32	14.02	15.56
Huh7	7.46	7.4	6.96	6.75	7.51	7.32		15.68	16.69	16.79	15.86	16.59	15.27
2E
	G2/M							s							G0/G1
HepG2	36.11	37.18	41.21	36.54	36.78	37.45		38.82	37.78	37.69	41.31	43.13	41.58		18.8	21.38	24.2	22.36	21.86	25.59
Huh7	12.45	14.34	15.12	13.45	12.96	14.81		31.58	36.23	34.47	35.85	34.88	31.43		50.29	54.9	56.21	53.66	49.82	47.63
	G2/M							s							G0/G1
HepG2	43.53	38.7	45.08	41.08	40.6	40.81		40.13	41.85	34.58	35.57	39.11	39.25		22.24	18.92	18.13	24.03	19.11	17.25
Huh7	19.85	20.75	18.87	17.28	16.66	19.43		42.27	36.88	33.57	32.27	37.69	33.28		39.81	49.08	42.73	43.06	47	49.22

## Sheet: Figure 3
3B
	NC mimic							miR-4270 mimic
DNMT3A-WT	1	1.04	1.01	0.91	0.92	1.02		0.31	0.34	0.28	0.33	0.29	0.4
DNMT3A-MUT	1.14	1.05	1.12	1.23	1.05	1.1		1.03	0.89	0.92	0.89	0.86	1.04
3C
	Anti-IgG							Anti-Ago2
miR-4270	1.04	0.96	1	1.02	0.96	1.03		5.48	5.47	5.89	5.88	6.09	5.59
DNMT3A	1.01	1	1.08	0.95	0.97	0.94		4.44	4.9	4.57	4.83	4.28	4.67
3D
	NC mimic							miR-4270 mimic							NC inhibitor							miR-4270 inhibitor
	1	0.95	0.95	1.01	0.98	1.04		4.47	4.88	4.52	4.96	5.06	4.64		1.18	1.13	1.14	1.07	1.2	1.04		0.36	0.27	0.25	0.24	0.26	0.33
3E
	NC mimic							miR-4270 mimic							NC inhibitor							miR-4270 inhibitor
	1	0.99	0.96	1.06	1.06	0.89		0.4	0.38	0.35	0.28	0.28	0.38		0.97	0.86	0.95	0.87	0.86	0.98		3.59	3.62	3.34	3.41	3.79	3.69
3F
	NC mimic							miR-4270 mimic							NC inhibitor							miR-4270 inhibitor
	1	0.97	1.06	0.97	1.02	1.14		0.45	0.4	0.43	0.39	0.43	0.38		0.93	1.03	1.06	1.11	1.09	1.1		2.81	2.67	2.93	2.83	2.86	3.09

## Sheet: Figure 4
4A
	Unmethylated							methylated
L02	73.15	66.52	67.53	65.99	75.06	67.34		29.57	34.46	27.48	35.47	29.25	28.24
HepG2	27.98	29.22	25.54	23.76	28.92	28.34		79.17	70.45	68.57	68.62	74.65	74.78
Huh7	36.63	29.5	32.44	29.93	30.33	31.76		66.2	67.22	70.47	72.04	61.94	71.6
4C
	NC mimic							miR-4270 mimic
IgG	0.27	0.33	0.29	0.23	0.18	0.36		0.07	0.11	0.17	0.29	0.22	0.0727
DNMT3A	27.6	28.56	24.12	30.99	27.69	26.72		10.3	10.62	12.24	12.27	12.82	10.97
4D
	Unmethylated							methylated
NC mimic	33.61	31.64	39.43	32.13	36.01	35.76		67.82	60.25	67.48	58.29	60.62	60.27
miR-4270 mimic	74.99	66.45	69.66	62.11	62.87	64.26		30.8	33.28	31.72	31.75	33.81	38.29
NC inhibitor	29.69	27.33	32.37	33.76	27.77	32.37		65.66	64.41	75.44	72.49	71.98	67.31
miR-4270 inhibitor	8.58	9.44	14.52	12.66	13	9.51		81.99	94.3	90.95	88.72	82.89	93.45
SGI-1027	81.72	73.24	74.45	81.36	71.92	86.6		18.75	23.79	21.22	23.37	21.25	22.34
SGI-1027+miR-4270 inhibitor	51.55	53.99	55.4	55.4	54.25	47.72		49.59	49.33	48.73	41.34	43.62	49.09
4C
	NC mimic							miR-4270 mimic							NC inhibitor							miR-4270 inhibitor							SGI-1027							SGI-1027+miR-4270 inhibitor
	1	1.03	1.02	1.07	0.95	1.02		2.64	2.66	2.97	2.92	2.94	2.94		1.12	0.95	1.07	1.1	1.15	1		0.55	0.56	0.57	0.5	0.51	0.51		2.72	2.72	2.31	2.51	2.65	2.65		1.46	1.25	1.37	1.28	1.3	1.46

## Sheet: Figure 5
5A
	NC inhibitor							miR-4270 inhibitor							miR-4270 inhibitor+pcDNA-3.1							miR-4270 inhibitor+pcDNA-HGFAC
	1	1.09	1.01	0.9	0.97	1.03		0.48	0.45	0.45	0.31	0.46	0.46		0.59	0.43	0.46	0.44	0.6	0.49
5B
	NC inhibitor							miR-4270 inhibitor							miR-4270 inhibitor+pcDNA-3.1							miR-4270 inhibitor+pcDNA-HGFAC
0 h	0.23	0.22	0.27	0.24	0.22	0.31		0.22	0.26	0.25	0.2	0.26	0.34		0.36	0.24	0.25	0.25	0.23	0.2		0.21	0.26	0.24	0.24	0.33	0.24
24 h	0.47	0.3	0.43	0.39	0.38	0.28		0.57	0.57	0.67	0.56	0.51	0.56		0.46	0.65	0.41	0.5	0.53	51		0.43	0.43	0.42	0.36	0.43	0.49
48 h	0.63	0.61	0.73	0.82	0.81	0.64		1.06	1.03	1.11	1.05	0.97	0.92		1.29	1.31	1.28	1.3	1.44	1.44		0.77	0.88	0.83	0.95	0.82	1
72 h	1.63	1.67	1.63	1.56	1.44	1.58		2.52	2.35	2.7	2.59	2.48	2.58		2.5	2.52	2.73	2.53	2.71	2.52		2.11	2.1	1.91	2.09	2.06	1.77
5C
	NC inhibitor							miR-4270 inhibitor							miR-4270 inhibitor+pcDNA-3.1							miR-4270 inhibitor+pcDNA-HGFAC
	154	130	153	159	167	152		262	236	225	254	252	232		261	267	275	239	237	224		179	183	199	176	144	190
5D
	NC inhibitor							miR-4270 inhibitor							miR-4270 inhibitor+pcDNA-3.1							miR-4270 inhibitor+pcDNA-HGFAC
	6.48	6.56	7.14	6.64	6.8	6.3		3.77	3.67	3.18	3.16	3.71	3.66		3.2	2.88	3.34	2.92	2.73	3.09		8.53	8.02	7.65	8.36	8.12	8.6
5E
	G2/M							S							G0/G1
NC inhibitor	30.66	29.86	35.49	33.87	30.6	30.65		41.59	34.43	37.96	42.35	39.02	42.94		27.53	26.26	31.29	30.19	26	29.29
miR-4270 inhibitor	50.94	42.57	42.83	41.53	41.39	42.74		42.38	39.87	39.91	45.39	44.65	49.68		12.15	14.45	12.06	12.15	11.76	13.48
miR-4270 inhibitor+pcDNA-3.1	34.9	34.95	39.85	41.52	41.05	41.7		47.38	38.39	46.83	47.26	47.56	47.58		15.84	13.94	14.67	13.81	16.97	15.88
miR-4270 inhibitor+pcDNA-HGFAC	46.16	48.93	45.96	45.07	42.3	41.06		34.55	30.6	28.64	33.01	34.23	31		22.24	20.43	23.98	25.49	24.43	21.88

## Sheet: Figure 6
6B
	NC mimic													miR-4270 mimic
0	55.66	40.19	50.25	38.68	52.69	42.85	46.68	38.14	46.25	44.42	49.57	49.57		47.27	48.73	47.74	49.29	47.86	50.08	57.35	55.7	52.71	45.41	53.8	54.67
5	70.4	66.01	63.59	74.42	66.53	65.41	67.25	63.29	61.82	67.24	60.39	80.59		53.78	63.03	48.8	56.02	58.79	51.22	56.1	54.15	53.85	58.46	57.48	51.38
10	84.32	97.54	99.6	89.07	96.81	85.92	95.45	84.45	88.42	105.7	84.32	97.74		62.08	61.25	71.52	71.92	76.19	71.95	63.71	71.08	65.52	62.18	63.5	76.23
15	146.08	152.76	139.88	125.2	155.07	140.61	141.42	137	140.71	129.71	139.55	126.56		79.7	86.37	84.17	86.05	77.16	76.59	72.78	84.46	70.75	82.5	78.92	90.21
20	148.35	142.17	145.11	155.49	155.84	142.5	160.37	179.31	147.32	143.47	1155.84	144.94		97.35	88.61	99.72	101.27	82.07	88.76	101.49	95.29	104.17	102.72	91.36	90.72
25	163.54	186.29	183.06	185.37	183.45	183.79	157.73	188.23	198.93	170.39	172.09	161.37		120.89	103.99	107.17	107.21	94.08	121.43	117.37	116.28	105.16	97.24	105.92	109.41
30	222.15	195.52	219.58	222.36	196.01	227.46	193	194.25	199.2	224.26	203.2	200.76		128.35	132	122.32	99.45	103.59	104.08	123.99	106.28	101.76	106.26	119.52	105.65
6C
	NC mimic													miR-4270 mimic
	0.85	0.87	0.79	0.85	0.81	0.88	0.72	0.84	0.84	0.76	0.89	0.87		0.27	0.33	0.38	0.22	0.29	0.4	0.41	0.26	0.31	0.4	0.31	0.32
6D
	NC mimic													miR-4270 mimic
	1	1.07	0.89	0.15	0.92	1.11	0.98	1.01	1.02	0.99	1.03	1.09		4.75	5.1	4.93	4.69	5.15	5.18	4.97	4.66	4.42	4.64	4.95	4.71
6E
	NC mimic													miR-4270 mimic
DNMT3A	1	1.04	0.97	1.04	1.01	0.98	0.95	1.05	0.95	1	0.95	0.99		0.72	0.55	0.62	0.62	0.58	0.64	0.61	0.58	0.64	0.64	0.56	0.58
HGFAC	1	1.08	0.97	0.91	1.05	0.98	0.89	0.96	0.92	1.04	1.06	0.99		2.87	2.9	2.82	2.88	2.84	2.9	3.14	2.79	3.08	2.77	3	2.54
