# Supplementary material for: miR-4270 suppresses hepatocellular carcinoma progression by inhibiting DNMT3A-mediated methylation of HGFAC promoter
Source: PeerJ. 2023 Dec 5;11:e16566. doi: 10.7717/peerj.16566 (PMC10704985; doi:10.7717/peerj.16566)
Supplement: Supplemental Information 5 [file peerj-11-16566-s005.xls]

## Sheet: Sheet1
ITEM TO CHECK	IMPORTANCE	CHECKLIST
EXPERIMENTAL DESIGN
Definition of experimental and control groups	E	Experimental group: tumor tissue from liver cancer patients; Control group: adjacent tissues of liver cancer patients
Number within each group	E	Experimental groups: n=114; Control groups: n=114
Assay carried out by core lab or investigator's lab?	D
Acknowledgement of authors' contributions	D
SAMPLE
Description	E	Tumor tissues and paracancerous tissues were obtained from HCC patients
Volume/mass of sample processed	D	Tissue samples: 40-60 mg
Microdissection or macrodissection	E	macrodissection
Processing procedure	E	Two-step centrifugation protocol (2000g for 10 min at 4°C, 12000g for 10 min at 4°C)
If frozen - how and how quickly?	E	Tumor and paracancerous tissue samples were immediately frozen in liquid nitrogen after they were washed with pre-cold PBS.
If fixed - with what, how quickly?	E	Not fixed.
Sample storage conditions and duration (especially for FFPE samples)	E	Samples were stored at -80°C until RNA extraction.
NUCLEIC ACID EXTRACTION
Procedure and/or instrumentation	E	RNA extraction from tissues and cultured cells. Total RNAs were extracted from tumor tissues and cultured cells using Trizol reagent according to the manufacturer's instructions. Briefly, 1 ml of Trizol Reagent was added to 50-100 mg of tissue. For cells RNA extraction, cells were washed twice with iced PBS. One milliliter of Trizol Reagent was added directly to the culture dish to lyse the cells…
Name of kit and details of any modifications	E	TRIzol reagent; PrimeScript Reagent Kit; SYBR Premix Ex TaqTM Kit
Source of additional reagents used	D	Chloroform (Merck); isopropyl alcohol (Beyotime); Ethanol (Beyotime); DEPC-Treated Water (Ambion) Water(Ambion)
Details of DNase or RNAse treatment	E	1 ug of RNA was treated with 1 ul of gDNA Erase and 2ul 5x gDNA Eraser Buffer in a 20 ul final volume reaction. Digestion of DNA was achieved with 2 minutes incubation at 42℃.
Contamination assessment (DNA or RNA)	E	Reverse transcription controls (without enzyme) were performed in order to assess the existence of DNA in the RNA sample. For that purpose, RNA was processed as a normal sample in the RT step,except that no reverse transcriptase was added to the reaction mixture.
Nucleic acid quantification	E	RNA concentration was assessed using spectrophotometry by measuring the bsorbance at 260 nm UV light.
Instrument and method	E	Spectrophotometry (Eppendorf).
Purity (A260/A280)	D	RNA purity was determined by measuring the absorbance at OD260 and OD280.
Yield	D	RNA yield was calculated using spectrophotometry.The average yield was about 1200 ng/ul for tissue RNA and approximate 190 ng/ul for plasma RNA.
RNA integrity method/instrument	E	RNA integrity was assessed using Agilent's 2100bioabalyzer (Agilent Technologies,Santa Clara, CA, USA)
RIN/RQI or Cq of 3' and 5' transcripts	E	Not Applicable
Electrophoresis traces	D
Inhibition testing (Cq dilutions, spike or other)	E	The standard curve has been considered sufficient to rule out the presence of inhibitors of reversee-transcipition on activity or PCR also taking into account the high quality of starting RNAs.
REVERSE TRANSCRIPTION
Complete reaction conditions	E	Reverse transcription was carried out in 20ul reaction volume.Briefly, 1ug total RNA, 2ul 5x gDNA Eraser Buffer, 1ul gDNA Eraser and nuclease-free water were mixed well and incubated for 2 min at 42℃ to eliminate genomic DNA. For the synthesis of cDNA, 4ul 5x PrimeScript Buffer 2, 1ul PrimeScript RT Enzyme Mix 1, 1ul RT Primer Mix and 4ul nuclease-Free water were then added, and the reaction mixt…
Amount of RNA and reaction volume	E	Amount of RNA:1000ng; Reaction volume: 20ul
Priming oligonucleotide (if using GSP) and concentration	E	Oligo dTprimer:50pmol/20ul reaction system
Reverse transcriptase and concentration	E	PrimeScript RT Enzyme Mix 1
Temperature and time	E	Specified in "Complete reaction conditions"
Manufacturer of reagents and catalogue numbers	D	PrimeScript™ RT reagent kit with gDNA Eraser (Takara:RR047A)
Cqs with and without RT	D*
Storage conditions of cDNA	D	Minus 20 degrees Celsius
qPCR TARGET INFORMATION
If multiplex, efficiency and LOD of each assay.	E	Described in text.
Sequence accession number	E	Described in text.
Location of amplicon	D
Amplicon length	E	No applicable.
In silico specificity screen (BLAST, etc)	E	Described in text.
Pseudogenes, retropseudogenes or other homologs?	D
Sequence alignment	D
Secondary structure analysis of amplicon	D
Location of each primer by exon or intron (if applicable)	E	No applicable.
What splice variants are targeted?	E	No applicable.
qPCR OLIGONUCLEOTIDES
Primer sequences	E	Described in text.
RTPrimerDB Identification Number	D
Probe sequences	D**
Location and identity of any modifications	E	No modifications were done.
Manufacturer of oligonucleotides	D	Invitrogen
Purification method	D	PAGE method
qPCR PROTOCOL
Complete reaction conditions	E	qPCR was carried out using SYBR® Premix Ex Tag™ II (Takara:RR820A)in 20ul reaction volumes. In brief, each reaction was comprised of 2ul of the cDNA solution,10ul of SYBR® Premix Ex Tag™(2x),1.6ul of primers,0.4ul of ROX Reference Dye II and 6ul of nuclease-free water. All qPCR reactions were performed on ABI 7500 Real-Time PCR System (Applied Blosystems, USA),using the following conditions:95℃ f…
Reaction volume and amount of cDNA/DNA	E	Reaction volume: 20ul; amount of cDNA: 2ul.
Primer, (probe), Mg++ and dNTP concentrations	E	0.4uM Primers; 2 mM MgCl2;0.2 mM dNTP
Polymerase identity and concentration	E	TakaRa Ex Tag HS
Buffer/kit identity and manufacturer	E	TakaRa
Exact chemical constitution of the buffer	D
Additives (SYBR Green I, DMSO, etc.)	E	SYBR Green I
Manufacturer of plates/tubes and catalog number	D	PCR Strip Tubes (PCR-0208-C) and PCR Strip Caps (PCR-2CP-RT-C), both provided by Axygen.
Complete thermocycling parameters	E	Initial denaturation :95°C for 30 s, followed by 40 cycles at 95°C for 5 s and 60°C for 34 s.
Reaction setup (manual/robotic)	D	Manual
Manufacturer of qPCR instrument	E	ABI 7500 Real-Time PCR Systerm (Applied Biosysterns, USA)
qPCR VALIDATION
Evidence of optimisation (from gradients)	D
Specificity (gel, sequence, melt, or digest)	E	Gene-specific amplification was confirmed by a single band in 2% agarose gel electrophoresis stained with ethidium bromide. No template co0ntrols were run for each genge to fetect unspecific amplification and primei dimeization.
For SYBR Green I, Cq of the NTC	E	The signal of the amplification plot was very late (Cq＞38) and therefore there was a high Cq value difference between the negative control and all the cDNA samples.
Standard curves with slope and y-intercept	E	U6: -3.4568x+24.135; miR-4270: -3.4746x+35.296; GAPDH: -3.4624x=33.369; Myd88: -3.4123x=36.48
PCR efficiency calculated from slope	E	U6: 93.9%; miR-4270: 94.4%; GAPDH: 95.6%; Myd88: 96.1%.
Confidence interval for PCR efficiency or standard error	D
r2 of standard curve	E	U6: 0.9794; miR-4270:0.9981; GAPDH: 0.9864; Myd88: 0.9930.
Linear dynamic range	E	In average, linear dynamic range was considered taking into account the linearity of the standard curves; from 1/10 dilution of cDNA to 1/1000 dilution.
Cq variation at lower limit	E	Not Applicable
Confidence intervals throughout range	D
Evidence for limit of detection	E	Not Applicable
If multiplex, efficiency and LOD of each assay.	E	Not Applicable
DATA ANALYSIS
qPCR analysis program (source, version)	E	Quantification software version 2.1 (Applied biosysterms, USA)
Cq method determination	E	The threshold was defined as the fractional cycle number at which the fluorescence exceeded the given threshold and was calculated using SDS Relative Quantification software version 2.1 using the automatic baseline setting.
Outlier identification and disposition	E	miRNA with the Cq values greater than 40 were defined the Cq values of 40.
Results of NTCs	E	The signal of the amplification plot was very late (Cq＞38) and therefore there was a high Cq value difference between the negative control and all the cDNA samples.
Justification of number and choice of reference genes	E	RefFinder, a web-based comprehensive tool, was then utilized to evaluate and screen the optimal reference gene for tissue miRNAs analysis.
Description of normalisation method	E	Described in text.
Number and concordance of biological replicates	D
Number and stage (RT or qPCR) of technical replicates	E	qPCR reactions were performed in triplicate.
Repeatability (intra-assay variation)	E	Mean standard deviation of tiplicates: less than 0.10
Reproducibility (inter-assay variation, %CV)	D
Power analysis	D
Statistical methods for result significance	E	The quantitative data derived from three independent experiments were expressed as mean ± SEM. The Shapiro-Wilk test was utilized to verify the data's normal distribution, while Levene's test was employed to assess the homogeneity of variance.
Software (source, version)	E	SPSS software was used to analysed all dates (ver. 21.0).
Cq or raw data submission using RDML	D
Table 1. MIQE checklist for authors, reviewers and editors. All essential information (E) must be submitted with the manuscript. Desirable
information (D) should be submitted if available. If using primers obtained from RTPrimerDB, information on qPCR target, oligonucleotides,
protocols and validation is available from that source.
*: Assessing the absence of DNA using a no RT assay is essential when first extracting RNA. Once the sample has been validated as
RDNA-free, inclusion of a no-RT control is desirable, but no longer essential.
**: Disclosure of the probe sequence is highly desirable and strongly encouraged. However, since not all commercial pre-designed assay
vendors provide this information, it cannot be an essential requirement. Use of such assays is advised against.
